# Supplementary material for: Blood Donors' Preferences Toward Incentives for Donation in China
Source: PubMed Central journal article supplement (PMC10267764; doi:10.1001/jamanetworkopen.2023.18320), 2023-06-14
Supplement: jamanetwopen-e2318320-s002.pdf [file jamanetwopen-e2318320-s002.pdf]

## Data Sharing Statement

Wang. Blood Donors' Preferences Toward Incentives for Donation in China. *JAMA Netw Open*.  
Published June 14, 2023. doi:10.1001/jamanetworkopen.2023.18320

### Data

**Data available:** No
